# Supplementary material for: Enterococcus casseliflavus KB1733 Isolated from a Traditional Japanese Pickle Induces Interferon-Lambda Production in Human Intestinal Epithelial Cells
Source: MDPI journal article supplement (doi:10.3390/microorganisms10040827), 2022-04-15
Supplement: s1 [file s1]

**Supplementary Tables S1–S2.**

**Table S1. Sources of isolation, genera, species, and names of the 135 strains evaluated in this study<sup>1</sup>.**

| No. | Sources of isolation (Prefecture in Japan);<br>main materials                                                                                   | Genera, species                               | Strain<br>name |
|-----|-------------------------------------------------------------------------------------------------------------------------------------------------|-----------------------------------------------|----------------|
| 1   | <b>Shiba-zuke (Kyoto);</b><br>Eggplant ( <i>Solanum melongena</i> ), Japanese basil ( <i>Perilla frutescens</i> var. <i>crispa</i> ), and salt. | <i>Lactiplantibacillus pentosus</i>           | KB625          |
| 2   |                                                                                                                                                 | <i>Lactiplantibacillus paraplantarum</i>      | KB642          |
| 3   |                                                                                                                                                 | <i>Companilactobacillus alimentarius</i>      | KB653          |
| 4   |                                                                                                                                                 | <i>Lactiplantibacillus plantarum</i>          | KB661          |
| 5   |                                                                                                                                                 | <i>Levilactobacillus brevis</i>               | KB670          |
| 6   |                                                                                                                                                 | <i>Pediococcus ethanolidurans</i>             | KB696          |
| 7   |                                                                                                                                                 | <i>Levilactobacillus brevis</i>               | KB699          |
| 8   |                                                                                                                                                 | <i>Leuconostoc mesenteroides</i>              | KB712          |
| 9   | <b>Nozanawa-zuke (Nagano);</b><br>Cruciferous vegetable ( <i>Brassica rapa</i> var. <i>hakabura</i> ) and salt.                                 | <i>Latilactobacillus sakei</i>                | KB732          |
| 10  |                                                                                                                                                 | <i>Latilactobacillus curvatus</i>             | KB738          |
| 11  |                                                                                                                                                 | <i>Weissella koreensis</i>                    | KB746          |
| 12  |                                                                                                                                                 | <i>Latilactobacillus curvatus</i>             | KB753          |
| 13  |                                                                                                                                                 | <i>Latilactobacillus sakei</i>                | KB757          |
| 14  |                                                                                                                                                 | <i>Lactiplantibacillus plantarum</i>          | KB759          |
| 15  |                                                                                                                                                 | <i>Weissella koreensis</i>                    | KB770          |
| 16  |                                                                                                                                                 | <i>Enterococcus mundtii</i>                   | KB772          |
| 17  | <b>Seisai-zuke (Yamagata);</b><br>Cruciferous vegetable ( <i>Brassica juncea</i> var. <i>integrifolia</i> ) and salt.                           | <i>Carnobacterium maltaromaticum</i>          | KB775          |
| 18  |                                                                                                                                                 | <i>Latilactobacillus curvatus</i>             | KB778          |
| 19  |                                                                                                                                                 | <i>Weissella koreensis</i>                    | KB798          |
| 20  |                                                                                                                                                 | <i>Latilactobacillus sakei</i>                | KB807          |
| 21  |                                                                                                                                                 | <i>Leuconostoc mesenteroides</i>              | KB835          |
| 22  |                                                                                                                                                 | <i>Leuconostoc mesenteroides</i>              | KB851          |
| 23  |                                                                                                                                                 | <i>Leuconostoc carnosum</i>                   | KB854          |
| 24  |                                                                                                                                                 | <i>Leuconostoc</i> sp.                        | KB862          |
| 25  | <b>Takana-zuke (Fukuoka);</b><br>Cruciferous vegetable ( <i>Brassica juncea</i> var. <i>integrifolia</i> ) and salt.                            | <i>Loigolactobacillus coryniformis</i>        | KB879          |
| 26  |                                                                                                                                                 | <i>Companilactobacillus alimentarius</i>      | KB881          |
| 27  |                                                                                                                                                 | <i>Lactiplantibacillus pentosus</i>           | KB888          |
| 28  |                                                                                                                                                 | <i>Levilactobacillus namurensis</i>           | KB897          |
| 29  |                                                                                                                                                 | <i>Levilactobacillus brevis</i>               | KB898          |
| 30  |                                                                                                                                                 | <i>Lactiplantibacillus plantarum</i>          | KB899          |
| 31  |                                                                                                                                                 | <i>Pediococcus parvulus</i>                   | KB920          |
| 32  |                                                                                                                                                 | <i>Pediococcus ethanolidurans</i>             | KB956          |
| 33  | <b>Akakabu-zuke (Gifu);</b><br>Turnip ( <i>Brassica rapa</i> var. <i>glabra</i> ), cucumber ( <i>Cucumis sativus</i> ), and salt.               | <i>Latilactobacillus curvatus</i>             | KB977          |
| 34  |                                                                                                                                                 | <i>Latilactobacillus sakei</i>                | KB989          |
| 35  |                                                                                                                                                 | <i>Limosilactobacillus fermentum</i>          | KB990          |
| 36  |                                                                                                                                                 | <i>Leuconostoc mesenteroides</i>              | KB1002         |
| 37  |                                                                                                                                                 | <i>Lactiplantibacillus plantarum</i>          | KB1015         |
| 38  |                                                                                                                                                 | <i>Lactiplantibacillus paraplantarum</i>      | KB1017         |
| 39  |                                                                                                                                                 | <i>Lentilactobacillus buchneri</i>            | KB1018         |
| 40  |                                                                                                                                                 | <i>Levilactobacillus parabrevis</i> /hammessi | KB1024         |
| 41  |                                                                                                                                                 | <i>Pediococcus parvulus</i>                   | KB1025         |
| 42  |                                                                                                                                                 | <i>Levilactobacillus brevis</i>               | KB1029         |

Table S1. Continued

| No. | Sources of isolation (Prefecture in Japan); main materials                                                               | Species of LAB                                   | Strain name |
|-----|--------------------------------------------------------------------------------------------------------------------------|--------------------------------------------------|-------------|
| 43  | <b>Suguki (Kyoto);</b><br>Turnip ( <i>Brassica rapa</i> var. <i>neosuguki</i> ) and salt.                                | <i>Levilactobacillus brevis</i>                  | KB290       |
| 44  |                                                                                                                          | <i>Limosilactobacillus fermentum</i>             | KB1036      |
| 45  |                                                                                                                          | <i>Pediococcus ethanolidurans</i>                | KB1046      |
| 46  |                                                                                                                          | <i>Levilactobacillus namurensis</i>              | KB1049      |
| 47  |                                                                                                                          | <i>Levilactobacillus brevis</i>                  | KB1066      |
| 48  |                                                                                                                          | <i>Companilactobacillus alimentarius</i>         | KB1087      |
| 49  |                                                                                                                          | <i>Lentilactobacillus buchneri</i>               | KB1088      |
| 50  |                                                                                                                          | <i>Companilactobacillus farciminis/crustorum</i> | KB1089      |
| 51  |                                                                                                                          | <i>Levilactobacillus parabrevis</i>              | KB1120      |
| 52  |                                                                                                                          | <i>Lactiplantibacillus plantarum</i>             | KB1125      |
| 53  |                                                                                                                          | <i>Levilactobacillus parabrevis/hamesii</i>      | KB1133      |
| 54  |                                                                                                                          | <i>Loigolactobacillus coryniformis</i>           | KB1137      |
| 55  |                                                                                                                          | <i>Lactiplantibacillus pentosus</i>              | KB1148      |
| 56  |                                                                                                                          | <i>Pediococcus acidilactici</i>                  | KB1150      |
| 57  |                                                                                                                          | <i>Limosilactobacillus reuteri</i>               | KB1153      |
| 58  |                                                                                                                          | <i>Lacticaseibacillus paracasei</i>              | KB1161      |
| 59  |                                                                                                                          | <i>Companilactobacillus alimentarius</i>         | KB1163      |
| 60  |                                                                                                                          | <i>Levilactobacillus parabrevis</i>              | KB1164      |
| 61  |                                                                                                                          | <i>Lactiplantibacillus pentosus</i>              | KB1167      |
| 62  |                                                                                                                          | <i>Pediococcus ethanolidurans</i>                | KB1168      |
| 63  |                                                                                                                          | <i>Lactiplantibacillus plantarum</i>             | KB1173      |
| 64  | <b>Asotakana-zuke (Kumamoto);</b><br>Cruciferous vegetable ( <i>Brassica juncea</i> var. <i>integrifolia</i> ) and salt. | <i>Loigolactobacillus coryniformis</i>           | KB1182      |
| 65  |                                                                                                                          | <i>Levilactobacillus brevis</i>                  | KB1183      |
| 66  |                                                                                                                          | <i>Levilactobacillus hamesii/parabrevis</i>      | KB1191      |
| 67  |                                                                                                                          | <i>Latilactobacillus sakei</i>                   | KB1194      |
| 68  |                                                                                                                          | <i>Pediococcus parvulus</i>                      | KB1203      |
| 69  |                                                                                                                          | <i>Latilactobacillus curvatus</i>                | KB1207      |
| 70  |                                                                                                                          | <i>Companilactobacillus nodensis</i>             | KB1211      |
| 71  |                                                                                                                          | <i>Furfurilactobacillus rossiae</i>              | KB1226      |
| 72  |                                                                                                                          | <i>Levilactobacillus brevis</i>                  | KB1218      |
| 73  |                                                                                                                          | <i>Lactiplantibacillus plantarum</i>             | KB1239      |
| 74  | <b>Pesora-zuke (Yamagata);</b><br>Eggplant, red pepper ( <i>Capsicum annuum</i> ), and salt.                             | <i>Lacticaseibacillus paracasei</i>              | KB1240      |
| 75  |                                                                                                                          | <i>Loigolactobacillus coryniformis</i>           | KB1242      |
| 76  |                                                                                                                          | <i>Latilactobacillus sakei</i>                   | KB1243      |
| 77  |                                                                                                                          | <i>Levilactobacillus namurensis</i>              | KB1245      |
| 78  |                                                                                                                          | <i>Companilactobacillus nodensis</i>             | KB1247      |
| 79  |                                                                                                                          | <i>Companilactobacillus paralimentarius</i>      | KB1251      |
| 80  |                                                                                                                          | <i>Lactiplantibacillus plantarum</i>             | KB1253      |
| 81  |                                                                                                                          | <i>Enterococcus avium</i>                        | KB1256      |
| 82  |                                                                                                                          | <i>Pediococcus ethanolidurans</i>                | KB1268      |
| 83  |                                                                                                                          | <i>Paucilactobacillus suebicus</i>               | KB1278      |
| 84  | <b>Inekokina-zuke (Nagano);</b><br>Inekokina ( <i>Brassica rapa</i> L. var. <i>hakabura Kitam.</i> ) and salt.           | <i>Latilactobacillus curvatus</i>                | KB1292      |
| 85  |                                                                                                                          | <i>Latilactobacillus sakei</i>                   | KB1300      |
| 86  |                                                                                                                          | <i>Leuconostoc mesenteroides</i>                 | KB1330      |

Table S1. Continued.

| No. | Sources of isolation (Prefecture in Japan); main materials      | Species of LAB                               | Strain name |
|-----|-----------------------------------------------------------------|----------------------------------------------|-------------|
| 87  | <b>Shakushina-zuke (Saitama);</b>                               | <i>Leuconostoc mesenteroides</i>             | KB1350      |
| 88  | Shakushina ( <i>Brassica rapa</i> ) and salt.                   | <i>Latilactobacillus sakei</i>               | KB1351      |
| 89  |                                                                 | <i>Carnobacterium gallinarum</i>             | KB1371      |
| 90  |                                                                 | <i>Enterococcus mundtii</i>                  | KB1372      |
| 91  |                                                                 | <i>Levilactobacillus brevis</i>              | KB1389      |
| 92  | <b>Kuki-zuke (Mie and Wakayama);</b>                            | <i>Enterococcus termitis</i>                 | KB1396      |
| 93  | Taro stalk ( <i>Colocasia esculenta</i> ), Japanese basil, plum | <i>Lactiplantibacillus pentosus</i>          | KB1397      |
| 94  | ( <i>Prunus mume</i> ) and salt.                                | <i>Lactiplantibacillus plantarum</i>         | KB1400      |
| 95  |                                                                 | <i>Levilactobacillus brevis</i>              | KB1420      |
| 96  |                                                                 | <i>Limosilactobacillus fermentum</i>         | KB1433      |
| 97  |                                                                 | <i>Pediococcus ethanolidurans</i>            | KB1434      |
| 98  |                                                                 | <i>Levilactobacillus namurensis</i>          | KB1436      |
| 99  | <b>Nanohana-zuke (Shiga);</b>                                   | <i>Levilactobacillus namurensis</i>          | KB1469      |
| 100 | Nanohana ( <i>Brassica rapa</i> ) and salt.                     | <i>Lactiplantibacillus plantarum</i>         | KB1471      |
| 101 |                                                                 | <i>Companilactobacillus alimentarius</i>     | KB1481      |
| 102 |                                                                 | <i>Ligilactobacillus acidipiscis</i>         | KB1488      |
| 103 |                                                                 | <i>Levilactobacillus hamessii/parabrevis</i> | KB1493      |
| 104 |                                                                 | <i>Companilactobacillus versmoldensis</i>    | KB1494      |
| 105 | <b>Tsudakabu-zuke (Shimane);</b>                                | <i>Latilactobacillus sakei</i>               | KB1495      |
| 106 | Turnip ( <i>Brassica rapa</i> var. <i>glabra</i> ) and salt.    | <i>Leuconostoc carnosum</i>                  | KB1518      |
| 107 |                                                                 | <i>Lactiplantibacillus paraplantarum</i>     | KB1524      |
| 108 |                                                                 | <i>Lactiplantibacillus plantarum</i>         | KB1540      |
| 109 |                                                                 | <i>Leuconostoc lactis</i>                    | KB1545      |
| 110 |                                                                 | <i>Leuconostoc mesenteroides</i>             | KB1549      |
| 111 |                                                                 | <i>Levilactobacillus brevis</i>              | KB1552      |
| 112 |                                                                 | <i>Leuconostoc citreum</i>                   | KB1564      |
| 113 |                                                                 | <i>Latilactobacillus curvatus</i>            | KB1589      |
| 114 | <b>Hinona-zuke (Shiga);</b>                                     | <i>Latilactobacillus curvatus</i>            | KB1637      |
| 115 | Hinona ( <i>Brassica rapa</i> ) and salt.                       | <i>Lactobacillus fuchuensis</i>              | KB1649      |
| 116 |                                                                 | <i>Leuconostoc mesenteroides</i>             | KB1652      |
| 117 |                                                                 | <i>Weissella hellenica/paramesenteroides</i> | KB1653      |
| 118 |                                                                 | <i>Latilactobacillus sakei</i>               | KB1662      |
| 119 |                                                                 | <i>Levilactobacillus brevis</i>              | KB1663      |
| 120 |                                                                 | <i>Pediococcus parvulus</i>                  | KB1664      |
| 121 |                                                                 | <i>Companilactobacillus alimentarius</i>     | KB1670      |
| 122 |                                                                 | <i>Loigolactobacillus coryniformis</i>       | KB1686      |
| 123 | <b>Otakabuna-zuke (Hiroshima);</b>                              | <i>Companilactobacillus alimentarius</i>     | KB1692      |
| 124 | Turnip leaf and salt.                                           | <i>Loigolactobacillus coryniformis</i>       | KB1701      |

Table S1. Continued.

| No. | Sources of isolation (Prefecture in Japan); main materials                   | Species of LAB                               | Strain name |
|-----|------------------------------------------------------------------------------|----------------------------------------------|-------------|
| 125 | <b>Wasabina-zuke (Shizuoka);</b>                                             | <i>Weissella paramesenteroides/hellenica</i> | KB1730      |
| 126 | Wasabina ( <i>Brassica juncea</i> var. <i>cernua</i> ), sake lees, and salt. | <i>Weissella paramesenteroides</i>           | KB1731      |
| 127 |                                                                              | <i>Enterococcus casseliflavus</i>            | KB1733      |
| 128 |                                                                              | <i>Lactiplantibacillus plantarum</i> group   | KB1742      |
| 129 |                                                                              | <i>Lactocaseibacillus paracasei</i>          | KB1754      |
| 130 |                                                                              | <i>Leuconostoc pseudomesenteroides</i>       | KB1756      |
| 131 |                                                                              | <i>Leuconostoc citreum</i>                   | KB1757      |
| 132 |                                                                              | <i>Weissella hellenica/paramesenteroides</i> | KB1765      |
| 133 |                                                                              | <i>Leuconostoc lactis</i>                    | KB1771      |
| 134 |                                                                              | <i>Leuconostoc mesenteroides</i>             | KB1773      |
| 135 |                                                                              | <i>Lentilactobacillus hilgardii</i>          | KB1781      |

<sup>1</sup>All LAB strains listed above have been maintained at the Research Institute, KAGOME CO., LTD. KB290 was deposited as strain *Levilactobacillus brevis* JCM17312 in the Japan Collection of Microorganisms.

Table S2. Relative luciferase activities of the 135 LAB strains<sup>1</sup>.

| Strain name | Relative luciferase activities (vs control) | Strain name | Relative luciferase activities (vs control) | Strain name | Relative luciferase activities (vs control) |
|-------------|---------------------------------------------|-------------|---------------------------------------------|-------------|---------------------------------------------|
| KB1400      | 1.58                                        | KB1518      | 1.08                                        | KB1771      | 0.97                                        |
|             | 1.25 (2 <sup>nd</sup> measurement)          | KB775       | 1.07                                        | KB1087      | 0.97                                        |
| KB1733      | 1.55                                        | KB746       | 1.07                                        | KB1765      | 0.96                                        |
|             | 1.63 (2 <sup>nd</sup> measurement)          | KB1493      | 1.05                                        | KB290       | 0.96                                        |
| KB898       | 1.41                                        | KB1436      | 1.05                                        | KB1066      | 0.95                                        |
| KB888       | 1.36                                        | KB1664      | 1.05                                        | KB625       | 0.94                                        |
| KB1649      | 1.35                                        | KB977       | 1.05                                        | KB1253      | 0.94                                        |
| KB1194      | 1.32                                        | KB1730      | 1.04                                        | KB854       | 0.94                                        |
| KB1589      | 1.30                                        | KB1148      | 1.04                                        | KB899       | 0.94                                        |
| KB1564      | 1.29                                        | KB642       | 1.04                                        | KB1549      | 0.93                                        |
| KB1552      | 1.24                                        | KB699       | 1.04                                        | KB1773      | 0.93                                        |
| KB1161      | 1.22                                        | KB1488      | 1.04                                        | KB1495      | 0.93                                        |
| KB1163      | 1.22                                        | KB1686      | 1.03                                        | KB1268      | 0.92                                        |
| KB807       | 1.20                                        | KB1692      | 1.03                                        | KB881       | 0.92                                        |
| KB1164      | 1.20                                        | KB956       | 1.03                                        | KB1540      | 0.92                                        |
| KB712       | 1.19                                        | KB738       | 1.03                                        | KB1481      | 0.91                                        |
| KB851       | 1.19                                        | KB1191      | 1.03                                        | KB1088      | 0.91                                        |
| KB1029      | 1.18                                        | KB920       | 1.03                                        | KB1781      | 0.91                                        |
| KB879       | 1.17                                        | KB1292      | 1.03                                        | KB1434      | 0.91                                        |
| KB1670      | 1.17                                        | KB1433      | 1.02                                        | KB1469      | 0.90                                        |
| KB1167      | 1.16                                        | KB759       | 1.02                                        | KB1494      | 0.90                                        |
| KB897       | 1.16                                        | KB753       | 1.02                                        | KB1397      | 0.90                                        |
| KB1701      | 1.14                                        | KB1663      | 1.02                                        | KB1251      | 0.90                                        |
| KB1652      | 1.14                                        | KB1545      | 1.01                                        | KB1242      | 0.89                                        |
| KB1524      | 1.14                                        | KB1168      | 1.01                                        | KB696       | 0.83                                        |
| KB989       | 1.13                                        | KB670       | 1.01                                        | KB1243      | 0.83                                        |
| KB990       | 1.13                                        | KB772       | 1.01                                        | KB1372      | 0.82                                        |
| KB1637      | 1.13                                        | KB1420      | 1.01                                        | KB1218      | 0.80                                        |
| KB1207      | 1.13                                        | KB1240      | 1.01                                        | KB1226      | 0.80                                        |
| KB1153      | 1.13                                        | KB1089      | 1.00                                        | KB1183      | 0.79                                        |
| KB1150      | 1.13                                        | KB1389      | 1.00                                        | KB1350      | 0.77                                        |
| KB1024      | 1.12                                        | KB1046      | 1.00                                        | KB1300      | 0.77                                        |
| KB732       | 1.12                                        | KB757       | 1.00                                        | KB1245      | 0.77                                        |
| KB1731      | 1.12                                        | KB1247      | 1.00                                        | KB1351      | 0.77                                        |
| KB798       | 1.10                                        | KB1256      | 0.99                                        | KB1203      | 0.76                                        |
| KB835       | 1.10                                        | KB1036      | 0.99                                        | KB1330      | 0.76                                        |
| KB1133      | 1.10                                        | KB1757      | 0.98                                        | KB1278      | 0.76                                        |
| KB1662      | 1.10                                        | KB1371      | 0.98                                        | KB1182      | 0.75                                        |
| KB1017      | 1.10                                        | KB1396      | 0.98                                        | KB1239      | 0.72                                        |
| KB778       | 1.09                                        | KB1742      | 0.98                                        | KB1173      | 0.72                                        |
| KB1018      | 1.09                                        | KB1211      | 0.98                                        | KB1137      | 0.71                                        |
| KB1002      | 1.09                                        | KB1756      | 0.98                                        | KB1125      | 0.69                                        |
| KB862       | 1.08                                        | KB1049      | 0.98                                        | KB1025      | 0.67                                        |
| KB1015      | 1.08                                        | KB1471      | 0.97                                        |             |                                             |
| KB661       | 1.08                                        | KB653       | 0.97                                        |             |                                             |
| KB770       | 1.08                                        | KB1754      | 0.97                                        |             |                                             |
| KB1120      | 1.08                                        | KB1653      | 0.97                                        |             |                                             |

<sup>1</sup>Control strain; *Lactococcus lactis* subsp. *lactis* JCM5805<sup>T</sup>.
